# Supplementary material for: Developing of case-importing teaching module-integrated 2D pathology and 3D radiology to improve learning effect in undergraduates of stomatology
Source: Research Square preprint supplement (doi:10.21203/rs.3.rs-2436316/v1), 2023-01-27
Supplement: Supplementary file 1 [file 8d275f7b72dd352efb8531de.doc]

**Appendix files**

**Attached Table 1 Questionnaire items of Group T**

| Project | Score (percentage) | | | | |
| --- | --- | --- | --- | --- | --- |
| 1 | 2 | 3 | 4 | 5 |
| Course richness | N/A | 6.7% | 20.0% | 33.3% | 40.0% |
| The activity of the class atmosphere | N/A | 6.7% | 26.7% | 66.7% | N/A |
| Improvement of learning motivation | N/A | 6.7% | 20.0% | 60.0% | 13.3% |
| Interaction between teachers and students | N/A | 20.0% | 26.7% | 20.0% | 33.3% |
| Timely mentoring for questions | N/A | N/A | N/A | 46.7% | 53.3% |
| Mastery of the pathology performance | N/A | N/A | N/A | 53.3% | 46.7% |
| Mastery of pathological slices reading skill | N/A | N/A | 46.7% | 46.7% | 6.7% |
| Mastery of radiology feature | N/A | N/A | 20.0% | 73.3% | 6.7% |
| Mastery of radiological film reading skill | N/A | 6.7% | 40.0% | 40.0% | 13.3% |
| Satisfaction of the learning effect | N/A | N/A | 13.3% | 60.0% | 26.7% |

**Attached Table 2 Questionnaire items of Group K**

| Project | Score (percentage) | | | | |
| --- | --- | --- | --- | --- | --- |
| 1 | 2 | 3 | 4 | 5 |
| Course richness | N/A | N/A | N/A | 80.0% | 20.0% |
| The activity of the class atmosphere | N/A | 13.3% | 20.0% | 33.3% | 33.3% |
| Improvement of learning motivation | N/A | 13.3% | 13.3% | 26.7% | 46.7% |
| Interaction between teachers and students | N/A | N/A | 33.3% | 40.0% | 26.7% |
| Timely mentoring for questions | N/A | N/A | 6.7% | 26.7% | 66.7% |
| Mastery of the pathology performance | N/A | N/A | 46.7% | 46.7% | 6.7% |
| Mastery of pathological slices reading skill | N/A | N/A | 33.3% | 53.3% | 13.3% |
| Mastery of radiology feature | N/A | N/A | 26.7% | 60.0% | 13.3% |
| Mastery of radiological film reading skill | N/A | 6.7% | 26.7% | 60.0% | 6.7% |
| Satisfaction of the learning effect | N/A | N/A | N/A | 46.7% | 53.3% |

**Attached Table 3 Questionnaire items of Group K-C**

| Project | Score (percentage) | | | | |
| --- | --- | --- | --- | --- | --- |
| 1 | 2 | 3 | 4 | 5 |
| Course richness | N/A | N/A | N/A | 40.0% | 60.0% |
| The activity of the class atmosphere | N/A | N/A | 13.3% | 53.3% | 33.3% |
| Improvement of learning motivation | N/A | N/A | 26.7% | 33.3% | 40.0% |
| Interaction between teachers and students | N/A | 6.7% | 13.3% | 46.7% | 33.3% |
| Timely mentoring for questions | N/A | N/A | 6.7% | 20.0% | 73.3% |
| Mastery of the pathology performance | N/A | N/A | 26.7% | 66.7% | 6.7% |
| Mastery of pathological slices reading skill | N/A | N/A | 26.7% | 46.7% | 26.7% |
| Mastery of radiology feature | N/A | N/A | N/A | 66.7% | 33.3% |
| Mastery of radiological film reading skill | N/A | N/A | 33.3% | 33.3% | 33.3% |
| Satisfaction of the learning effect | N/A | N/A | N/A | 20.0% | 80.0% |

**Attached Table 4 Questionnaire items of Group C-K**

| Project | Score (percentage) | | | | |
| --- | --- | --- | --- | --- | --- |
| 1 | 2 | 3 | 4 | 5 |
| Course richness | N/A | N/A | N/A | 20.0% | 80.0% |
| The activity of the class atmosphere | N/A | N/A | 6.7% | 46.7% | 46.7% |
| Improvement of learning motivation | N/A | N/A | 13.3% | 46.7% | 40.0% |
| Interaction between teachers and students | N/A | N/A | 26.7% | 13.3% | 60.0% |
| Timely mentoring for questions | N/A | N/A | 6.7% | 26.7% | 66.7% |
| Mastery of the pathology performance | N/A | N/A | 46.7% | 46.7% | 6.7% |
| Mastery of pathological slices reading skill | N/A | N/A | 26.7% | 60.0% | 13.3% |
| Mastery of radiology feature | N/A | N/A | 6.7% | 66.7% | 26.7% |
| Mastery of radiological film reading skill | N/A | N/A | 26.7% | 60.0% | 13.3% |
| Satisfaction of the learning effect | N/A | N/A | N/A | 46.7% | 53.3% |
